# Supplementary material for: Atrial Function Impairments after Pediatric Cardiac Surgery Evaluated by STE Analysis
Source: MDPI journal article supplement (doi:10.3390/jcm11092497), 2022-04-29
Supplement: s1 [file s1]

## SUPPLEMENTAL TABLES

**Supplementary Table S1.** Mean differences of examinations at different pre-/post-operative times and in control group.

|                                | Pre Vs T1 | Pre Vs T2 | Pre Vs T3 | T1 Vs T2 | T2 Vs T3 | T1 Vs T3 | Control Vs Pre | Control Vs T1 | Control Vs T2 | Control Vs T3 |
|--------------------------------|-----------|-----------|-----------|----------|----------|----------|----------------|---------------|---------------|---------------|
|                                | p         | p         | p         | p        | p        | p        | p              | p             | p             | p             |
| (R-Gating) LA $\varepsilon$ R  | <0.0001*  | 0.0072*   | 0.97      | 0.0126*  | 0.0164*  | <0.0001* | <0.0001*       | <0.0001*      | <0.0001*      | <0.0001*      |
| (R-Gating) LA $\varepsilon$ Cd | 0.0011*   | 0.08      | 0.69      | 0.07     | 0.028*   | 0.0003*  | <0.0001*       | <0.0001*      | <0.0001*      | <0.0001*      |
| (R-Gating) LA $\varepsilon$ Ct | 0.0043*   | 0.17      | 0.94      | 0.15     | 0.29     | 0.0214*  | 0.4            | <0.0001*      | <0.0001*      | 0.4           |
| (P-Gating) LA $\varepsilon$ R  | <0.0001*  | 0.0055*   | 0.94      | 0.007*   | 0.0146*  | <0.0001* | <0.0001*       | <0.0001*      | <0.0001*      | <0.0001*      |
| (P-Gating) LA $\varepsilon$ Cd | 0.007*    | 0.15      | 0.67      | 0.144    | 0.022*   | 0.0017*  | <0.0001*       | <0.0001*      | <0.0001*      | <0.0001*      |
| (P-Gating) LA $\varepsilon$ Ct | 0.001*    | 0.0183*   | 0.52      | 0.157    | 0.32     | 0.0292*  | 0.72           | <0.0001*      | <0.0001*      | 0.25          |
| (R-Gating) RA $\varepsilon$ R  | <0.0001*  | <0.0001*  | 0.0003*   | 0.022*   | 0.0103*  | <0.0001* | <0.0001*       | <0.0001*      | <0.0001*      | <0.0001*      |
| (R-Gating) RA $\varepsilon$ Cd | <0.0001*  | <0.0001*  | 0.002*    | 0.08     | 0.08     | 0.0009*  | <0.0001*       | <0.0001*      | <0.0001*      | <0.0001*      |
| (R-Gating) RA $\varepsilon$ Ct | <0.0001*  | <0.0001*  | 0.0379*   | 0.215    | 0.11     | 0.0066*  | 0.25           | <0.0001*      | <0.0001*      | <0.0001*      |
| (P-Gating) RA $\varepsilon$ R  | <0.0001*  | <0.0001*  | <0.0001*  | 0.0152*  | 0.015*   | <0.0001* | <0.0001*       | <0.0001*      | <0.0001*      | <0.0001*      |
| (P-Gating) RA $\varepsilon$ Cd | <0.0001*  | <0.0001*  | 0.0042*   | 0.06     | 0.19     | 0.002*   | <0.0001*       | <0.0001*      | <0.0001*      | <0.0001*      |
| (P-Gating) RA $\varepsilon$ Ct | <0.0001*  | <0.0001*  | 0.019*    | 0.37     | 0.15     | 0.027*   | 0.29           | <0.0001*      | <0.0001*      | 0.0004*       |

$\varepsilon$  = strain, R= reservoir, Ct= contractile, Cd= conduit.

**Supplementary Table S2.** Atrial STE  $\varepsilon$  mean values at different post-operative times for the entire cohort and in different age groups.

|                                | Pre   |       | Time 1 (T1) |       | Time 2 (T2) |       | Time 3 (T3) |       | Pre Vs T1 | Pre Vs T2 | Pre Vs T3 | T1 Vs T2 | T1 Vs T3 | T2 Vs T3 |
|--------------------------------|-------|-------|-------------|-------|-------------|-------|-------------|-------|-----------|-----------|-----------|----------|----------|----------|
|                                | Mean  | SD    | Mean        | SD    | Mean        | SD    | Mean        | SD    | p         | p         | p         | p        | p        | p        |
| <b>Younger than 6 months</b>   |       |       |             |       |             |       |             |       |           |           |           |          |          |          |
| (R-Gating) LA $\varepsilon$ R  | 31.26 | 8.04  | 23.91       | 10.45 | 27.84       | 9.46  | 35.10       | 12.72 | 0.0019    | 0.12      | 0.18      | 0.08     | 0.0001   | 0.01     |
| (R-Gating) LA $\varepsilon$ Cd | 16.95 | 7.55  | 15.73       | 7.72  | 16.75       | 7.18  | 19.83       | 8.57  | 0.5       | 0.91      | 0.19      | 0.5      | 0.04     | 0.1      |
| (R-Gating) LA $\varepsilon$ Ct | 14.29 | 6.78  | 10.17       | 6.98  | 12.03       | 5.93  | 15.26       | 9.99  | 0.014     | 0.15      | 0.7       | 0.2      | 0.01     | 0.1      |
| (P-Gating) LA $\varepsilon$ R  | 27.34 | 6.62  | 21.72       | 8.51  | 24.85       | 7.34  | 30.03       | 9.61  | 0.003     | 0.16      | 0.2       | 0.08     | 0.0003   | 0.02     |
| (P-Gating) LA $\varepsilon$ Cd | 15.08 | 7.13  | 14.83       | 7.83  | 15.25       | 7.10  | 17.42       | 7.63  | 0.9       | 0.92      | 0.24      | 0.8      | 0.2      | 0.24     |
| (P-Gating) LA $\varepsilon$ Ct | 12.28 | 5.32  | 9.11        | 5.82  | 10.53       | 4.75  | 12.63       | 7.18  | 0.02      | 0.16      | 0.8       | 0.2      | 0.02     | 0.16     |
| (R-Gating) RA $\varepsilon$ R  | 34.35 | 9.67  | 18.19       | 10.28 | 22.25       | 9.14  | 26.32       | 15.42 | <0.0001   | <0.0001   | 0.04      | 0.09     | 0.02     | 0.25     |
| (R-Gating) RA $\varepsilon$ Cd | 20.91 | 7.17  | 12.71       | 7.62  | 12.87       | 7.88  | 15.13       | 11.14 | <0.0001   | 0.0002    | 0.04      | 0.9      | 0.32     | 0.4      |
| (R-Gating) RA $\varepsilon$ Ct | 13.47 | 7.64  | 7.97        | 6.28  | 10.87       | 6.37  | 12.62       | 8.16  | 0.0023    | 0.17      | 0.7       | 0.06     | 0.02     | 0.4      |
| (P-Gating) RA $\varepsilon$ R  | 30.27 | 7.54  | 16.74       | 8.72  | 20.09       | 7.25  | 23.01       | 11.83 | <0.0001   | <0.0001   | 0.02      | 0.09     | 0.02     | 0.28     |
| (P-Gating) RA $\varepsilon$ Cd | 18.68 | 6.81  | 11.44       | 7.48  | 12.03       | 8.39  | 13.80       | 10.33 | 0.0002    | 0.002     | 0.06      | 0.76     | 0.3      | 0.5      |
| (P-Gating) RA $\varepsilon$ Ct | 11.61 | 5.96  | 7.68        | 5.69  | 9.62        | 4.93  | 10.55       | 6.09  | 0.01      | 0.2       | 0.5       | 0.14     | 0.08     | 0.6      |
| <b>Older than 6 months</b>     |       |       |             |       |             |       |             |       |           |           |           |          |          |          |
| (R-Gating) LA $\varepsilon$ R  | 38.58 | 13.18 | 26.79       | 13.47 | 31.84       | 12.44 | 35.50       | 14.75 | 0.0001    | 0.03      | 0.4       | 0.7      | 0.013    | 0.4      |
| (R-Gating) LA $\varepsilon$ Cd | 24.18 | 11.00 | 16.12       | 9.17  | 19.52       | 8.28  | 23.54       | 9.73  | 0.0004    | 0.04      | 0.8       | 0.07     | 0.002    | 0.9      |
| (R-Gating) LA $\varepsilon$ Ct | 13.66 | 5.91  | 11.10       | 7.91  | 12.57       | 8.99  | 12.27       | 7.07  | 0.1       | 0.5       | 0.4       | 0.4      | 0.5      | 0.2      |
| (P-Gating) LA $\varepsilon$ R  | 33.59 | 10.40 | 23.54       | 10.51 | 27.91       | 9.41  | 31.20       | 11.03 | <0.0001   | 0.015     | 0.4       | 0.04     | 0.005    | 0.4      |
| (P-Gating) LA $\varepsilon$ Cd | 21.18 | 9.33  | 14.59       | 8.07  | 17.46       | 7.40  | 20.87       | 7.79  | 0.0008    | 0.06      | 0.9       | 0.08     | 0.002    | 0.8      |
| (P-Gating) LA $\varepsilon$ Ct | 12.42 | 4.56  | 9.59        | 6.01  | 10.68       | 6.42  | 10.60       | 5.47  | 0.02      | 0.19      | 0.2       | 0.4      | 0.48     | 0.16     |
| (R-Gating) RA $\varepsilon$ R  | 41.76 | 14.06 | 19.64       | 8.80  | 22.53       | 7.83  | 29.91       | 14.17 | <0.0001   | <0.0001   | 0.004     | 0.13     | 0.0006   | 0.6      |
| (R-Gating) RA $\varepsilon$ Cd | 24.15 | 10.19 | 10.18       | 5.64  | 14.01       | 8.03  | 17.93       | 9.48  | <0.0001   | <0.0001   | 0.03      | 0.02     | <0.0001  | 0.5      |
| (R-Gating) RA $\varepsilon$ Ct | 17.71 | 7.56  | 9.55        | 6.93  | 9.62        | 7.24  | 12.41       | 7.77  | <0.0001   | <0.0001   | 0.02      | 0.96     | 0.13     | 0.9      |
| (P-Gating) RA $\varepsilon$ R  | 35.54 | 10.30 | 17.66       | 7.22  | 20.41       | 6.75  | 25.97       | 10.52 | <0.0001   | <0.0001   | 0.002     | 0.08     | 0.0004   | 0.6      |
| (P-Gating) RA $\varepsilon$ Cd | 20.86 | 8.78  | 9.39        | 5.52  | 13.14       | 8.12  | 15.83       | 8.21  | <0.0001   | 0.0003    | 0.04      | 0.02     | 0.0003   | 0.5      |
| (P-Gating) RA $\varepsilon$ Ct | 14.77 | 5.36  | 8.56        | 5.77  | 8.46        | 5.79  | 10.62       | 5.67  | <0.0001   | <0.0001   | 0.008     | 0.93     | 0.17     | 0.9      |

$\varepsilon$ = strain, LAR=left atrial reservoir, LACT=left atrial contractile, RAR= right atrium reservoir, RACT=right atrium contractile.

**Supplementary Table S3.** Correlations of Atrial STE  $\varepsilon$  with outcome predictors at Time 1.

|                                | CPB   |       | CC    |       | STAT  |       | Aristotle |       | ETT  | ICU LOS | Age  | BSA  |
|--------------------------------|-------|-------|-------|-------|-------|-------|-----------|-------|------|---------|------|------|
|                                | beta  | p     | beta  | p     | beta  | p     | beta      | p     | p    | p       | p    | p    |
| (R-Gating) LA $\varepsilon$ R  |       | 0.18  |       | 0.3   | -3.78 | 0.008 |           | 0.06  | 0.8  | 0.8     | 0.97 | 0.4  |
| (R-Gating) LA $\varepsilon$ Cd | -0.03 | 0.02  |       | 0.07  | -1.98 | 0.045 | -1.1      | 0.039 | 0.7  | 0.9     | 0.8  | 0.6  |
| (R-Gating) LA $\varepsilon$ Ct |       | 0.5   |       | 0.4   |       | 0.59  |           | 0.9   | 0.98 | 0.4     | 0.4  | 0.86 |
| (P-Gating) LA $\varepsilon$ R  |       | 0.09  |       | 0.2   | -2.98 | 0.008 | -1.2      | 0.04  | 0.7  | 0.7     | 0.9  | 0.38 |
| (P-Gating) LA $\varepsilon$ Cd | -0.02 | 0.03  |       | 0.1   |       | 0.14  |           | 0.06  | 0.7  | 0.9     | 0.9  | 0.72 |
| (P-Gating) LA $\varepsilon$ Ct |       | 0.4   |       | 0.25  |       | 0.86  |           | 0.9   | 0.8  | 0.4     | 0.4  | 0.8  |
| (R-Gating) RA $\varepsilon$ R  | -0.04 | 0.02  |       | 0.1   |       | 0.3   |           | 0.5   | 0.7  | 0.2     | 0.6  | 0.8  |
| (R-Gating) RA $\varepsilon$ Cd | -0.02 | 0.009 | -0.04 | 0.045 |       | 0.31  |           | 0.67  | 0.1  | 0.8     | 0.5  | 0.5  |
| (R-Gating) RA $\varepsilon$ Ct |       | 0.9   |       | 0.6   |       | 0.9   |           | 0.8   | 0.2  | 0.1     | 0.5  | 0.4  |
| (P-Gating) RA $\varepsilon$ R  | -0.03 | 0.013 |       | 0.09  |       | 0.3   |           | 0.5   | 0.5  | 0.3     | 0.4  | 0.7  |
| (P-Gating) RA $\varepsilon$ Cd | -0.03 | 0.004 | -0.04 | 0.009 |       | 0.08  |           | 0.8   | 0.4  | 0.8     | 0.4  | 0.6  |

|                                |     |      |     |     |     |     |      |     |
|--------------------------------|-----|------|-----|-----|-----|-----|------|-----|
| (P-Gating) RA $\varepsilon$ Ct | 0.7 | 0.91 | 0.8 | 0.7 | 0.2 | 0.2 | 0.35 | 0.3 |
|--------------------------------|-----|------|-----|-----|-----|-----|------|-----|

CPB=cardiopulmonary bypass, ICU LOS= intensive care long of stay, ETT=extubating time,  $\varepsilon$ = strain, LAR=left atrial reservoir, LACT=left atrial contractile, RAR= right atrium reservoir, RACT=right atrium contractile.

**Supplementary Table S4.** Correlation between Atrial and ventricular STE  $\varepsilon$  at Time 1 and Time 2.

|                                | LV 4 Ch $\varepsilon$ |        | LV 2 Ch $\varepsilon$ |        | LV 3 Ch $\varepsilon$ |        | LVGL $\varepsilon$ |        | RVGL $\varepsilon$ |   | LV EF% |      |
|--------------------------------|-----------------------|--------|-----------------------|--------|-----------------------|--------|--------------------|--------|--------------------|---|--------|------|
|                                | beta                  | p      | beta                  | p      | beta                  | p      | beta               | p      | beta               | p | beta   | p    |
| <b>At Time 1</b>               |                       |        |                       |        |                       |        |                    |        |                    |   |        |      |
| (R-Gating) LA $\varepsilon$ R  | 0.85                  | 0.0007 | 0.99                  | 0.0002 | 0.9                   | 0.002  | 1.08               | 0.0002 |                    |   | 0.6    | 0.28 |
| (R-Gating) LA $\varepsilon$ Cd | 0.4                   | 0.03   | 0.6                   | 0.002  | 0.57                  | 0.004  | 0.63               | 0.0016 |                    |   | 0.7    | 0.13 |
| (R-Gating) LA $\varepsilon$ Ct |                       | 0.1    |                       | 0.06   |                       | 0.3    |                    | 0.09   |                    |   | 0.6    | 0.2  |
| (P-Gating) LA $\varepsilon$ R  | 0.66                  | 0.0008 | 0.8                   | 0.0002 | 0.72                  | 0.0015 | 0.87               | 0.0001 |                    |   | 0.7    | 0.22 |
| (P-Gating) LA $\varepsilon$ Cd |                       | 0.12   | 0.47                  | 0.007  | 0.46                  | 0.013  | 0.49               | 0.008  |                    |   | 0.8    | 0.2  |
| (P-Gating) LA $\varepsilon$ Ct |                       | 0.2    |                       | 0.1    |                       | 0.45   |                    | 0.17   |                    |   | 0.54   | 0.16 |
| (R-Gating) RA $\varepsilon$ R  |                       | 0.08   |                       | 0.16   |                       | 0.13   |                    | 0.11   |                    |   | 0.59   | 0.37 |
| (R-Gating) RA $\varepsilon$ Cd |                       | 0.99   |                       | 0.57   |                       | 0.44   |                    | 0.51   |                    |   | 0.17   | 0.57 |
| (R-Gating) RA $\varepsilon$ Ct |                       | 0.2    |                       | 0.23   |                       | 0.3    |                    | 0.19   |                    |   | 0.51   | 0.54 |
| (P-Gating) RA $\varepsilon$ R  |                       | 0.14   |                       | 0.27   |                       | 0.18   |                    | 0.19   |                    |   | 0.47   | 0.52 |
| (P-Gating) RA $\varepsilon$ Cd |                       | 0.9    |                       | 0.28   |                       | 0.23   |                    | 0.22   |                    |   | 0.19   | 0.33 |
| (P-Gating) RA $\varepsilon$ Ct |                       | 0.25   |                       | 0.32   |                       | 0.45   |                    | 0.26   |                    |   | 0.61   | 0.73 |
| <b>At Time 2</b>               |                       |        |                       |        |                       |        |                    |        |                    |   |        |      |
| (R-Gating) LA $\varepsilon$ R  | 0.7                   | 0.019  | 0.6                   | 0.048  |                       | 0.05   | 0.68               | 0.038  |                    |   | 0.22   | 0.29 |
| (R-Gating) LA $\varepsilon$ Cd | 0.46                  | 0.02   |                       | 0.16   |                       | 0.28   |                    | 0.13   |                    |   | 0.8    | 0.23 |
| (R-Gating) LA $\varepsilon$ Ct |                       | 0.09   |                       | 0.05   | 0.45                  | 0.035  | 0.44               | 0.04   |                    |   | 0.05   | 0.23 |
| (P-Gating) LA $\varepsilon$ R  | 0.56                  | 0.01   |                       | 0.05   |                       | 0.07   | 0.52               | 0.037  |                    |   | 0.3    | 0.05 |
| (P-Gating) LA $\varepsilon$ Cd | 0.4                   | 0.03   |                       | 0.26   |                       | 0.42   |                    | 0.2    |                    |   | 0.7    | 0.4  |
| (P-Gating) LA $\varepsilon$ Ct |                       | 0.06   | 0.31                  | 0.03   | 0.35                  | 0.02   | 0.36               | 0.03   |                    |   | 0.05   | 0.18 |
| (R-Gating) RA $\varepsilon$ R  | 0.66                  | 0.004  |                       | 0.07   | 0.72                  | 0.004  | 0.66               | 0.011  | 0.44               |   | 0.044  | 0.3  |
| (R-Gating) RA $\varepsilon$ Cd | 0.68                  | 0.0017 |                       | 0.2    | 0.72                  | 0.002  | 0.64               | 0.0092 |                    |   | 0.13   | 0.14 |
| (R-Gating) RA $\varepsilon$ Ct |                       | 0.21   |                       | 0.06   |                       | 0.15   |                    | 0.12   |                    |   | 0.08   | 0.2  |
| (P-Gating) RA $\varepsilon$ R  | 0.61                  | 0.0014 |                       | 0.06   | 0.65                  | 0.0014 | 0.61               | 0.0048 | 0.41               |   | 0.023  | 0.25 |
| (P-Gating) RA $\varepsilon$ Cd | 0.64                  | 0.0044 |                       | 0.31   | 0.69                  | 0.0046 | 0.6                | 0.0186 |                    |   | 0.07   | 0.2  |
| (P-Gating) RA $\varepsilon$ Ct |                       | 0.19   | 0.31                  | 0.045  |                       | 0.15   |                    | 0.11   |                    |   | 0.07   | 0.16 |

$\varepsilon$ = strain. LAR=left atrial reservoir, LACT=left atrial contractile, RAR= right atrium reservoir, RACT=right atrium contractile, LV= left ventricle, GL= global, RVGL= right ventricular global longitudinal strain, LV EF= left ventricle ejection fraction.
